# Supplementary material for: Effectiveness of letters to patients with or without Cochrane blogshots on 10-year cardiovascular risk change among women in menopausal transition: 6-month three-arm randomized controlled trial
Source: Springer Nature journal article supplement (doi:10.1186/s12916-022-02555-2), 2022-10-20

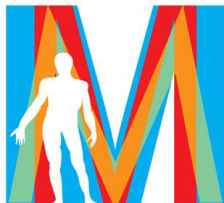

Sveučilište u Splitu  
Medicinski fakultet

Universitas studiorum  
Spalatensis  
Facultas Medica

Šoltanska 2, 21 000 Split,  
Hrvatska  
Tel: +385 (0)21 557 900  
Fax: 021 557 625  
e-mail: office@mefst.hr  
web: www.mefst.hr

## Additional file 1:

### Letter 1: The first letter sent to all trial participants (control group and intervention groups) (in Croatian).

Poštovana gđo. \_\_\_\_\_,

Na početku Vam se želim zahvaliti na pristanku za sudjelovanje u istraživanju koje provodimo. Zahvaljujem Vam u svoje osobno ime kao i u ime svih članova tima koji ulažu mnogo vremena i truda u istraživanje. Vaš doprinos nam mnogo znači i vjerujemo da ćemo i dalje nastaviti u dobrom smjeru.

Ovim prvim pismom Vas želimo upoznati s rizikom za bolesti srca i krvnih žila, koji kod Vas iznosi \_\_\_\_ %. Slijedi tablični prikaz mjera kojima se procjenjuje rizik, u kojem su istaknute one vrijednosti koje su više od referentnih (normalnih), utječu na rizik za bolesti srca i krvnih žila i samim time ga povećavaju.

| Demografski podatci |        | Kolesterol |        | Krvni tlak   |       | Rizični čimbenici |       |
|---------------------|--------|------------|--------|--------------|-------|-------------------|-------|
| Godine              | _____  | Ukupni     | mmol/l | Sistolički   | mmHg  | Šećerna bolest    | da/ne |
| Spol                | žensko | HDL        | mmol/l | Dijastolički | mmHg  | Pušenje           | da/ne |
| Rasa                | bijela |            |        | Na terapiji  | da/ne |                   |       |

Referentne vrijednosti:

ukupni kolesterol < 5 mmol/l; HDL-kolesterol > 1.2 mmol/l;

sistolički krvni tlak < 120 mmHg; dijastolički krvni tlak < 80 mmHg.

Još jednom Vam se zahvaljujem na sudjelovanju u istraživanju.

Nadam se da ćemo i dalje moći računati na Vas.

S poštovanjem,

Slavica Jurić Petričević, dr. med.



Sveučilište u Splitu  
Medicinski fakultet

Universitas studiorum  
Spalatensis  
Facultas Medica

Šoltanska 2, 21 000 Split,  
Hrvatska  
Tel: +385 (0)21 557 900  
Fax: 021 557 625  
e-mail: office@mefst.hr  
web: www.mefst.hr

---

**Letter 2: The letter containing the reminder about the CVD risk, sent to the passive intervention group (in Croatian).**

Poštovana gđo. \_\_\_\_\_,

Ovim pismom želim Vas podsjetiti na rizik za bolesti srca i krvnih žila, koji kod Vas iznosi \_\_\_\_\_%. U tabličnom prikazu mjera kojima se procjenjuje rizik, istaknute su one vrijednosti koje su više od referentnih (normalnih) te utječu na rizik za bolesti srca i krvnih žila i samim time ga povećavaju.

| Demografski podatci |        | Kolesterol |        | Krvni tlak   |       | Rizični čimbenici |       |
|---------------------|--------|------------|--------|--------------|-------|-------------------|-------|
| Godine              | _____  | Ukupni     | mmol/l | Sistolički   | mmHg  | Šećerna bolest    | da/ne |
| Spol                | žensko | HDL        | mmol/l | Dijastolički | mmHg  | Pušenje           | da/ne |
| Rasa                | bijela |            |        | Na terapiji  | da/ne |                   |       |

Referentne vrijednosti:

ukupni kolesterol < 5 mmol/l; HDL-kolesterol > 1.2 mmol/l;

sistolički krvni tlak < 120 mmHg; dijastolički krvni tlak < 80 mmHg.

Zahvaljujem Vam na sudjelovanju u istraživanju.

S poštovanjem,

Slavica Jurić Petričević, dr. med.

---



Sveučilište u Splitu  
Medicinski fakultet

Universitas studiorum  
Spalatensis  
Facultas Medica

Šoltanska 2, 21 000 Split,  
Hrvatska  
Tel: +385 (0)21 557 900  
Fax: 021 557 625  
e-mail: office@mefst.hr  
web: www.mefst.hr

**Letter 3: The letter containing the reminder about the CVD risk and the blogshot about the effect of calcium in the prevention of high blood pressure, sent to the active intervention group (in Croatian).**

Poštovana gđo. \_\_\_\_\_,

Ovim pismom želim Vas podsjetiti na rizik za bolesti srca i krvnih žila, koji kod Vas iznosi \_\_\_\_\_%. U tabličnom prikazu mjera kojima se procjenjuje rizik, istaknute su one vrijednosti koje su više od referentnih (normalnih) te utječu na rizik za bolesti srca i krvnih žila i samim time ga povećavaju.

| Demografski podatci |        | Kolesterol |        | Krvni tlak   |       | Rizični čimbenici |       |
|---------------------|--------|------------|--------|--------------|-------|-------------------|-------|
| Godine              | _____  | Ukupni     | mmol/l | Sistolički   | mmHg  | Šećerna bolest    | da/ne |
| Spol                | žensko | HDL        | mmol/l | Dijastolički | mmHg  | Pušenje           | da/ne |
| Rasa                | bijela |            |        | Na terapiji  | da/ne |                   |       |

Referentne vrijednosti:

ukupni kolesterol < 5 mmol/l; HDL-kolesterol > 1.2 mmol/l;

sistolički krvni tlak < 120 mmHg; dijastolički krvni tlak < 80 mmHg.

Zahvaljujem Vam na sudjelovanju u istraživanju.

S poštovanjem,

Slavica Jurić Petričević, dr. med.

Kako bismo Vam pomogli u smanjenju rizika za bolesti srca i krvnih žila, u narednim pismima predstaviti ćemo Vam neke znanstveno provjerene informacije o zdravlju. U nastavku pisma prikazujemo Vam **znanstvene dokaze o tome kako dodatni unos kalcija djeluje na krvni tlak**. Znanstvene dokaze sažela je organizacija **Cochrane** – globalna neovisna mreža znanstvenika, profesionalnih zdravstvenih radnika, pacijenata, skrbnika i ljudi zainteresiranih



Sveučilište u Splitu  
Medicinski fakultet

Universitas studiorum  
Spalatensis  
Facultas Medica

Šoltanska 2, 21 000 Split,  
Hrvatska

Tel: +385 (0)21 557 900

Fax: 021 557 625

e-mail: [office@mefst.hr](mailto:office@mefst.hr)

web: [www.mefst.hr](http://www.mefst.hr)

za zdravlje, okupljenih oko jednoga zajedničkog cilja – izrade i diseminacije Cochraneovih sustavnih pregleda. Cochrane sustavni pregledni članci su znanstvena izvješća u kojima su sva postojeća objavljena primarna istraživanja vezana za ljudsko zdravlje prikupljena, kritički analizirana i sintetizirana, a zatim recenzirana. Sustavni pregledi randomiziranih kontroliranih pokusa ključni su u primjeni medicine utemeljene na dokazima.

Za vas smo pripremili vrlo kratki sažetak članka u obliku slikovnog bloga.

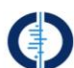

**Cochrane**  
Hrvatska

### Dodatni kalcij za sprječavanje povišenog krvnog tlaka

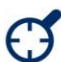

Visoki krvni tlak je ozbiljan zdravstveni problem koji povećava rizik za bolesti srca. Sniženje krvnog tlaka može umanjiti učestalost bolesti srčanih krvnih žila, srčanog udara i smrti. Povećanim unosom kalcija nadomjescima ili hranom obogaćenom kalcijem utvrđeno je blago sniženje sistoličkog i dijastoličkog krvnog tlaka, a učinak je bio veći kada su doze kalcija prelazile 1000 mg/dan.

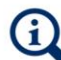

Cochrane sustavni pregled: 16 studija s 3048 ispitanika, muškaraca i žena od 11 do 82 godine. Niti u jednom istraživanju nisu prijavljeni štetni učinci.

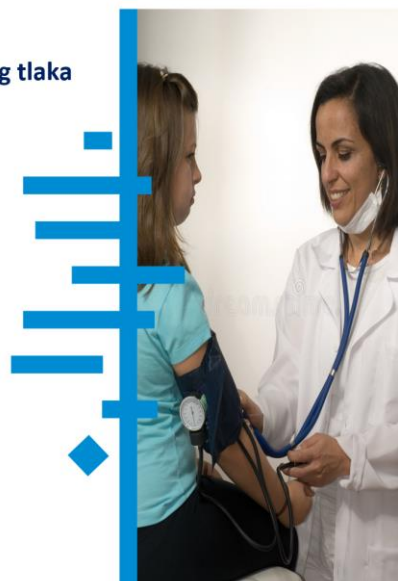



Sveučilište u Splitu  
Medicinski fakultet

Universitas studiorum  
Spalatensis  
Facultas Medica

Šoltanska 2, 21 000 Split,  
Hrvatska  
Tel: +385 (0)21 557 900  
Fax: 021 557 625  
e-mail: office@mefst.hr  
web: www.mefst.hr

**Letter 4: The letter containing the reminder about the CVD risk and the blogshot about the effect of effects of reducing saturated fat acids on the risk of CVD, sent to the active intervention group (in Croatian).**

Poštovana gđo. \_\_\_\_\_,

Ovim pismom želim Vas podsjetiti na rizik za bolesti srca i krvnih žila, koji kod Vas iznosi \_\_\_\_\_%. U tabličnom prikazu mjera kojima se procjenjuje rizik, istaknute su one vrijednosti koje su više od referentnih (normalnih) te utječu na rizik za bolesti srca i krvnih žila i samim time ga povećavaju.

| Demografski podatci |        | Kolesterol |        | Krvni tlak   |       | Rizični čimbenici |       |
|---------------------|--------|------------|--------|--------------|-------|-------------------|-------|
| Godine              | _____  | Ukupni     | mmol/l | Sistolički   | mmHg  | Šećerna bolest    | da/ne |
| Spol                | žensko | HDL        | mmol/l | Dijastolički | mmHg  | Pušenje           | da/ne |
| Rasa                | bijela |            |        | Na terapiji  | da/ne |                   |       |

Referentne vrijednosti:

ukupni kolesterol < 5 mmol/l; HDL-kolesterol > 1.2 mmol/l;

sistolički krvni tlak < 120 mmHg; dijastolički krvni tlak < 80 mmHg.

Zahvaljujem Vam na sudjelovanju u istraživanju.

S poštovanjem,

Slavica Jurić Petričević, dr. med.

Kako bih Vam pomogla u smanjenju rizika za bolesti srca i krvnih žila, u narednim pismima predstaviti ću Vam neke znanstveno provjerene informacije o zdravlju. U nastavku pisma prikazujem Vam **znanstvene dokaze o pozitivnom učinku smanjenja zasićenih masnih kiselina u prehrani**. Znanstvene dokaze sažela je organizacija **Cochrane** – globalna neovisna mreža znanstvenika, profesionalnih zdravstvenih radnika, pacijenata, skrbnika i ljudi zainteresiranih za zdravlje, okupljenih oko jednoga zajedničkog cilja – izrade i diseminacije



Sveučilište u Splitu  
Medicinski fakultet

Universitas studiorum  
Spalatensis  
Facultas Medica

Šoltanska 2, 21 000 Split,  
Hrvatska  
Tel: +385 (0)21 557 900  
Fax: 021 557 625  
e-mail: office@mefst.hr  
web: www.mefst.hr

Cochraneovih sustavnih pregleda. Cochrane sustavni pregledni članci su znanstvena izvješća u kojima su sva postojeća objavljena primarna istraživanja vezana za ljudsko zdravlje prikupljena, kritički analizirana i sintetizirana, a zatim recenzirana. Sustavni pregledi randomiziranih kontroliranih pokusa ključni su u primjeni medicine utemeljene na dokazima. Za Vas sam pripremila vrlo kratki sažetak članka u obliku slikovnog bloga.

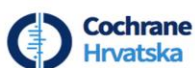

**Cochrane**  
Hrvatska

### Učinak smanjenja zasićenih masnih kiselina u prehrani na rizik za bolesti srca i krvnih žila

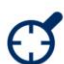

Smanjenim unosom zasićenih masnih kiselina snižava se rizik za bolesti srca i krvnih žila. Promjenom vrste masnoće u prehrani, odnosno zamjenom zasićenih masnih kiselina (onih životinjskog podrijetla) polinezasićenim masnim kiselinama (biljna ulja, nezasićeni namazi) postiže se zaštitni učinak. Zaštitni učinak je veći što je veće smanjenje zasićenih masnih kiselina u prehrani.

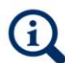

Cochrane sustavni pregled: 15 studija s više od 59000 ispitanika – muškaraca i žena starijih od 18 godina.

[croatia.cochrane.org](http://croatia.cochrane.org) | [@HRCochrane](https://twitter.com/HRCochrane) | [#cochranevidence](https://www.facebook.com/cochraneevidence) | [#blogshot](https://www.instagram.com/cochraneevidence) | Originally by Cochrane UK

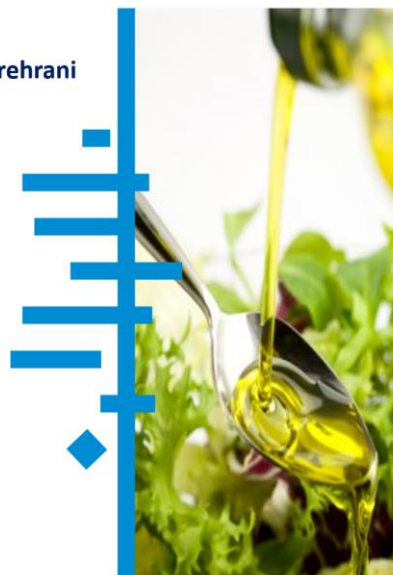



Sveučilište u Splitu  
Medicinski fakultet

Universitas studiorum  
Spalatensis  
Facultas Medica

Šoltanska 2, 21 000 Split,  
Hrvatska  
Tel: +385 (0)21 557 900  
Fax: 021 557 625  
e-mail: office@mefst.hr  
web: www.mefst.hr

**Letter 5: The letter containing the reminder about the CVD risk and the blogshot about the effect of green and black tea on the prevention of CVD, sent to the active intervention group.**

Poštovana gđo. \_\_\_\_\_,

Ovim pismom želim Vas podsjetiti na rizik za bolesti srca i krvnih žila, koji kod Vas iznosi \_\_\_\_\_%. U tabličnom prikazu mjera kojima se procjenjuje rizik, istaknute su one vrijednosti koje su više od referentnih (normalnih) te utječu na rizik za bolesti srca i krvnih žila i samim time ga povećavaju.

| Demografski podatci |        | Kolesterol |        | Krvni tlak   |       | Rizični čimbenici |       |
|---------------------|--------|------------|--------|--------------|-------|-------------------|-------|
| Godine              | _____  | Ukupni     | mmol/l | Sistolički   | mmHg  | Šećerna bolest    | da/ne |
| Spol                | žensko | HDL        | mmol/l | Dijastolički | mmHg  | Pušenje           | da/ne |
| Rasa                | bijela |            |        | Na terapiji  | da/ne |                   |       |

Referentne vrijednosti:

ukupni kolesterol < 5 mmol/l; HDL-kolesterol > 1.2 mmol/l;

sistolički krvni tlak < 120 mmHg; dijastolički krvni tlak < 80 mmHg.

Zahvaljujem Vam na sudjelovanju u istraživanju.

S poštovanjem,

Slavica Jurić Petričević, dr. med.

Kako bih Vam pomogla u smanjenju rizika za bolesti srca i krvnih žila, u narednim pismima predstaviti ću Vam neke znanstveno provjerene informacije o zdravlju. U nastavku pisma prikazujem Vam **znanstvene dokaze o pozitivnom učinku zelenog i crnog čaja u prevenciji srčano-žilnih bolesti**. Znanstvene dokaze sažela je organizacija **Cochrane** – globalna neovisna mreža znanstvenika, profesionalnih zdravstvenih radnika, pacijenata, skrbnika i ljudi zainteresiranih za zdravlje, okupljenih oko jednoga zajedničkog cilja – izrade i diseminacije Cochraneovih sustavnih pregleda. Cochrane sustavni pregledni članci su znanstvena izvješća u



Sveučilište u Splitu  
Medicinski fakultet

Universitas studiorum  
Spalatensis  
Facultas Medica

Šoltanska 2, 21 000 Split,  
Hrvatska  
Tel: +385 (0)21 557 900  
Fax: 021 557 625  
e-mail: office@mefst.hr  
web: www.mefst.hr

kojima su sva postojeća objavljena primarna istraživanja vezana za ljudsko zdravlje prikupljena, kritički analizirana i sintetizirana, a zatim recenzirana. Sustavni pregledi randomiziranih kontroliranih pokusa ključni su u primjeni medicine utemeljene na dokazima. Za Vas sam pripremila vrlo kratki sažetak članka u obliku slikovnog bloga.

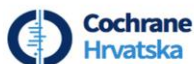

**Cochrane**  
Hrvatska

### Zeleni i crni čaj za prevenciju srčano-žilnih bolesti

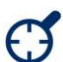

Rizik od srčano-žilnih bolesti može biti smanjen mijenjanjem različitih rizičnih čimbenika, kao npr. prehrana, što uključuje i pijenje čaja.

Zeleni i crni čaj imaju blagotvoran učinak na razinu masnoća u krvi i krvni tlak, a posebice se koristan učinak odnosi na razinu LDL-kolesterola.

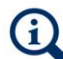

Cochrane sustavni pregled: 11 randomiziranih kontroliranih studija; crni čaj je ispitan u 4 studije, a zeleni u 7 studija. Studije su trajala od 3 do 6 mjeseci.

[croatia.cochrane.org](http://croatia.cochrane.org) | [@HRCochrane](https://twitter.com/HRCochrane) | [#cochranevidence](https://hashtagevidence.com/#cochranevidence) #blogshot | Originally by Cochrane UK

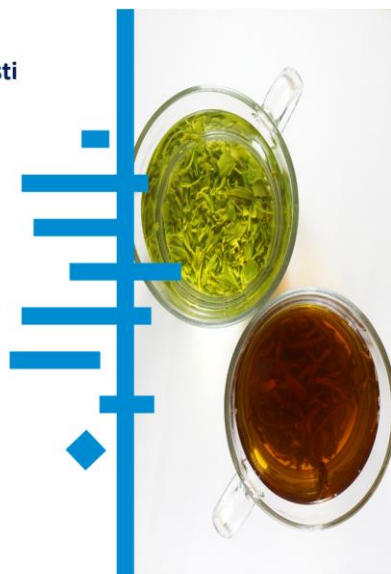

Supplement: MOESM1 [file 23624424]
